# Supplementary material
Source: publisher figshare collection journal article supplement (https://gsajournals.figshare.com/ndownloader/files/27375911)
Supplement: Supplementary file 1 [file 27375911]

## Sheet: Feuil1
Table S4. Cell diameter and percentage of titan cells
Strain	Size Mean (µm)	Titan Cells (%)
Cn162	5.73 ± 1.79	5.98
Cn191	3.51 ± 0.60	0.00
Cn139	3.65 ± 0.70	0.00
Cn116	8.51 ± 3.43	31.62
Cn222	6.70 ± 1.91	6.67
Cn223	6.12 ± 1.58	4.13
Cn271	4.94 ± 0.85	0.00
176A1	ND	ND
144A1	ND	ND
106A1	4.75 ± 1.04	0.00
32Bp1	4.93 ± 0.88	0.00
19Pb4	ND	ND
5Pb2	ND	ND
4C	ND	ND
2B	4.12 ± 0.67	0.00
2C	3.86 ± 0.62	0.00
Cn359	6.99 ± 1.98	7.19
Cn87	4.31 ± 0.67	0.00
3Pb3	7.93 ± 2.22	22.45
151A1	9.34 ± 3.34	45.13
96A1	3.71 ± 1.04	0.00
81A1	5.21 ± 1.14	0.00
69A1	ND	ND
68B1	4.84 ± 1.54	0.00
56A1	3.81 ± 0.56	0.00
54A1	4.09 ± 1.01	0.00
23Pb2	4.29 ± 1.26	0.00
2D	5.40 ± 1.19	0.00
1B	7.08 ± 1.66	9.09
Cn186	4.81 ± 0.96	0.00
Cn161	9.71 ± 4,80	39.65
Cn160	5.29 ± 0.97	0.00
Cn115	5.8 ± 1.37	0.00
Cn118	3.36 ± 0.64	0.00
RR2605	10.10 ± 3.72	42.30
H99	6.85 ± 2.66	16.67
Cn218	6.07 ± 0.89	0.00
Cg366	3.64 ± 0.95	0.00
Cn14HC	ND	ND
Cn225	4.30 ± 0.77	0.00
Cn216	5.70 ± 1.82	0.00
Cg460	8.12 ± 1.38	7.89
Cg461	ND	ND
Cg434	10.36 ± 4.84	33.33
Cg221	8.00 ± 1.72	11.11
Cg158	9.12 ± 2.76	35.42
Cg188	10.38 ± 2.56	49.19
Cn894	14.19 ± 3.09	97.33
Cn201	8.40 ± 1.46	14.81
Cg456	8.04 ± 1.33	5.17
Cg367	9.6 ± 1.70	50.81
Cg368	7.11 ± 1.54	2.08
Cg365	9.37 ± 1.83	38.64
Cg198	7.79 ± 1.20	5.45
Table S5. Cell diameter before and after titanization.
Strain	Size Mean (µm) before titanization	Size Mean (µm) after titanization
Cn116	5.29 ± 0.64	8,51 ± 3,43
3Pb3	4.34 ± 0.59	7,93 ± 2,22
151A1	5.58 ± 0.69	9,34 ± 3,34
Cn161	5.20 ± 1.72	9,71 ± 4,80
RR2605	5.70 ± 0.85	10,10 ± 3,72
H99	5.28 ± 0.53	6.85 ± 2.64
Cg434	4.73 ± 0.58	10,36 ± 4,84
Cg158	4.43 ± 0.49	9,12 ± 2,76
Cg188	4.98 ± 0.60	10,38 ± 2,56
Cn894	4.18 ± 0.81	14,19 ± 3,09
Cg367	4.62 ± 0.60	9,6 ± 1,70
Cg365	4.70 ± 073	9,37 ± 1,83
